# Supplementary material
Source: PubMed Central journal article supplement (PMC7193963)
Supplement: supp_RA119000279_154529_3_supp_491202_q714m3.pdf [file supp_RA119000279_154529_3_supp_491202_q714m3.pdf]

**Supplemental Table S1.**

| Type IA        |                |                |                | Type IB                | Type IC                | Type II                    | Length (aa) |     |
|----------------|----------------|----------------|----------------|------------------------|------------------------|----------------------------|-------------|-----|
| SK137          | 266            | J165           | HL072PA1       | KPA171202              | HL097PA1               | ATCC11828                  |             |     |
| WP_002515192.1 | WP_002515192.1 | WP_002515192.1 | WP_002515192.1 | AAT82349.1<br>(312 aa) | EGE72844.1<br>(312 aa) | WP_002514103.1<br>(317 aa) | 113         | 317 |
| WP_002519208.1 | WP_002519208.1 | WP_002519208.1 | WP_002519208.1 |                        |                        |                            | 190         |     |
| WP_002515422.1 | WP_002515422.1 | WP_002515422.1 | WP_002515422.1 | WP_002515422.1         |                        |                            | 318         |     |
|                | WP_002516281.1 | WP_002516281.1 | WP_002516281.1 |                        |                        |                            | 807         |     |
| WP_002515849.1 | WP_002515849.1 | WP_002515849.1 | WP_002515849.1 | WP_002515849.1         |                        |                            | 823         |     |
|                | WP_002515392.1 | WP_002515392.1 | WP_002515392.1 |                        |                        | WP_002515392.1             | 761         |     |
|                | AEE73342.1     | AEE73342.1     | AEE73342.1     |                        |                        |                            | 237         |     |
| WP_002515431.1 | WP_002515431.1 | WP_002515431.1 | WP_002515431.1 |                        |                        |                            | 407         |     |
| WP_002515878.1 | WP_002515878.1 | WP_002515878.1 | WP_002515878.1 |                        |                        |                            | 309         |     |
|                | WP_002516320.1 | WP_002516320.1 | WP_002516320.1 |                        |                        |                            | 339         |     |
| WP_002515456.1 | WP_002515456.1 | WP_002515456.1 | WP_002515456.1 | WP_002515456.1         |                        |                            | 387         |     |

**Supplemental Table S1. Conserved potential lipase genes in Type IA *C. acnes***

Conserved lipase genes in type IA *C. acnes* genomes based on the annotations of SK137, 266, J165, and HL072PA1. KPA171202, HL097PA1, and ATCC11828 are shown as examples of type IB, IC and II. Relatively short proteins are only detected in type IA *C. acnes* and these two proteins are highly conserved within a single protein in other types. The sequence homologies of combined type IA proteins (WP\_002515192.1 and WP\_002519208.1) with type IB AAT82349.1 is 97%, type IC *C. acnes* EGE72844.1 is 96%, and type II WP\_002514103 is 83%. This high homology indicates protein on the top column originated from a common ancestor.

**Supplemental Figure S1.**

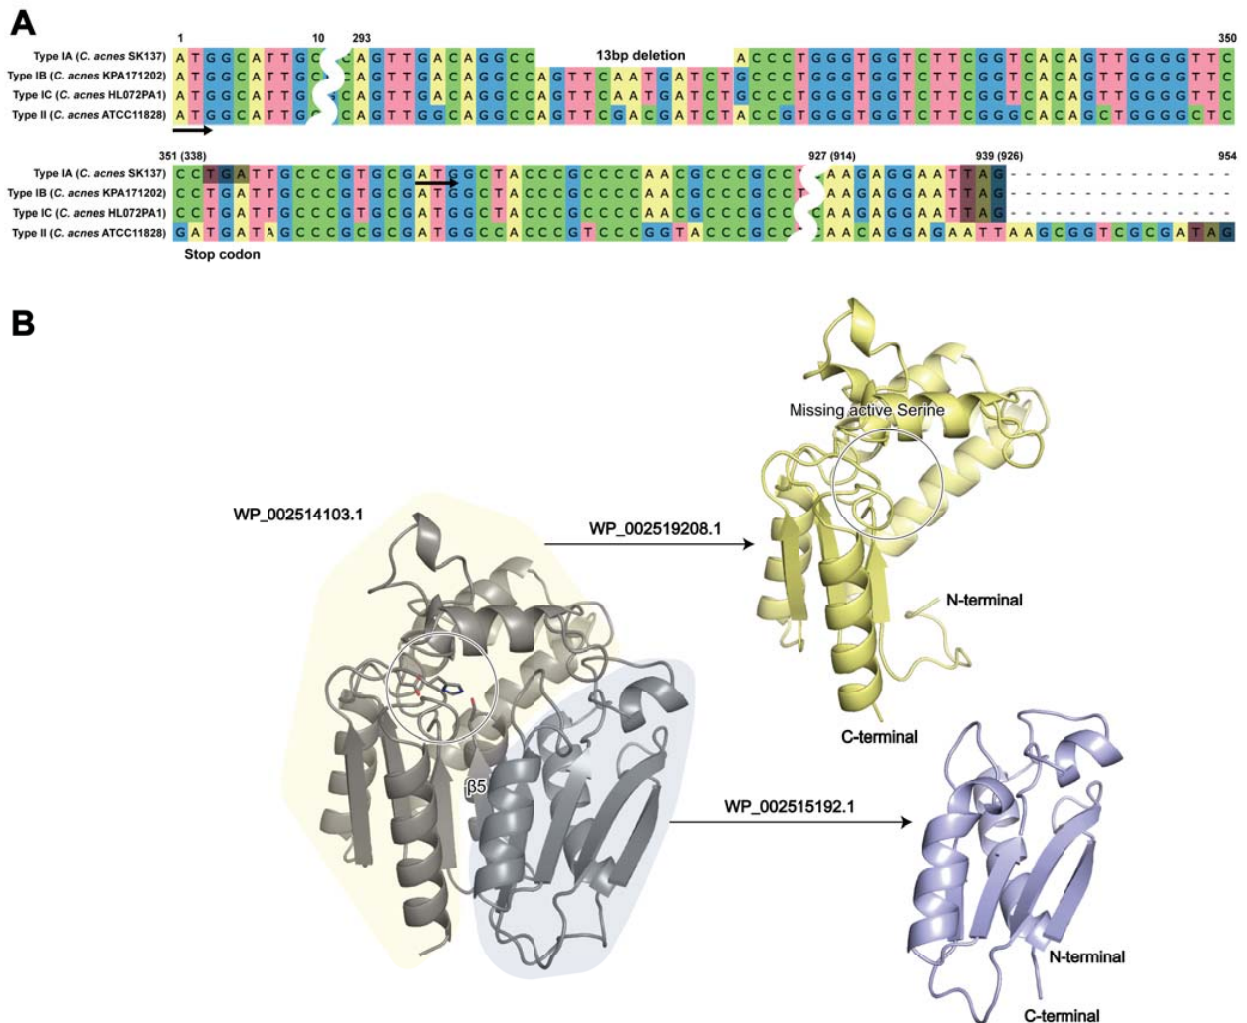

**Supplemental Figure S1.**

A) Deletions and frameshift observed in type IA lipase ORF. The lipase ORF for conserved lipase proteins that are highlighted in Supplemental Table S1. The nucleotide numbers are indicated above. Type IA strains show 13 nucleotides deletion, leading to a frameshift and introduction of a stop codon.

B) The structures of two short hydrolases from type I *C. acnes* are modeled using SWISS-MODEL workspace (coloured as yellow and blue) based on  $c_{AL}$  lipase structure (coloured as grey). Both structures are considered unstable. Hydrophobic residues are exposed to solvent areas and loops do not support whole structured regions.

Supplemental Figure S2.

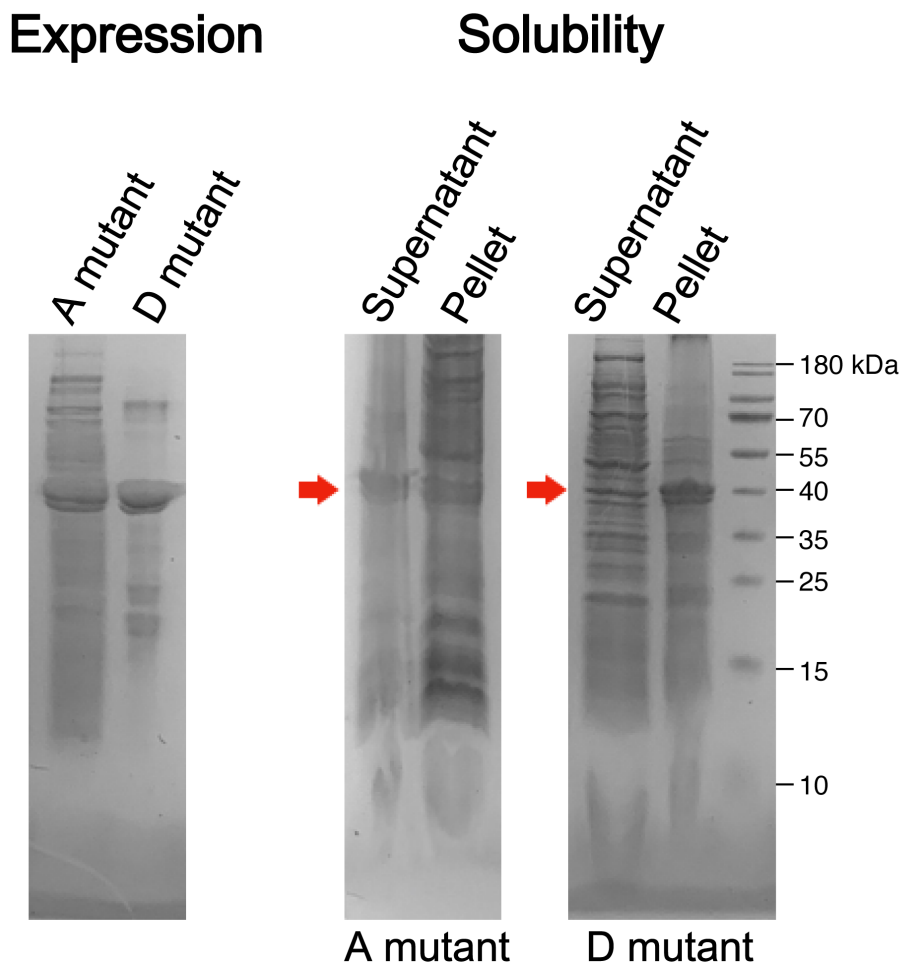

[A mutant] Active site shielding residues mutant

[D mutant] Dimer mutant

Supplemental Figure S2.

Measurements of  $CAIIPase$  mutants' expression and solubility were performed by SDS-PAGE. *E. coli* BL21 (DE3) cells (Agilent, U.S.A.) were used for all expression experiments. The active site shielding residues mutant (F176F179W192F211A) was successfully expressed in soluble state, but dimer mutant (E5D54D202K205D206A) was produced as inclusion bodies.

**Supplemental Figure S3.**

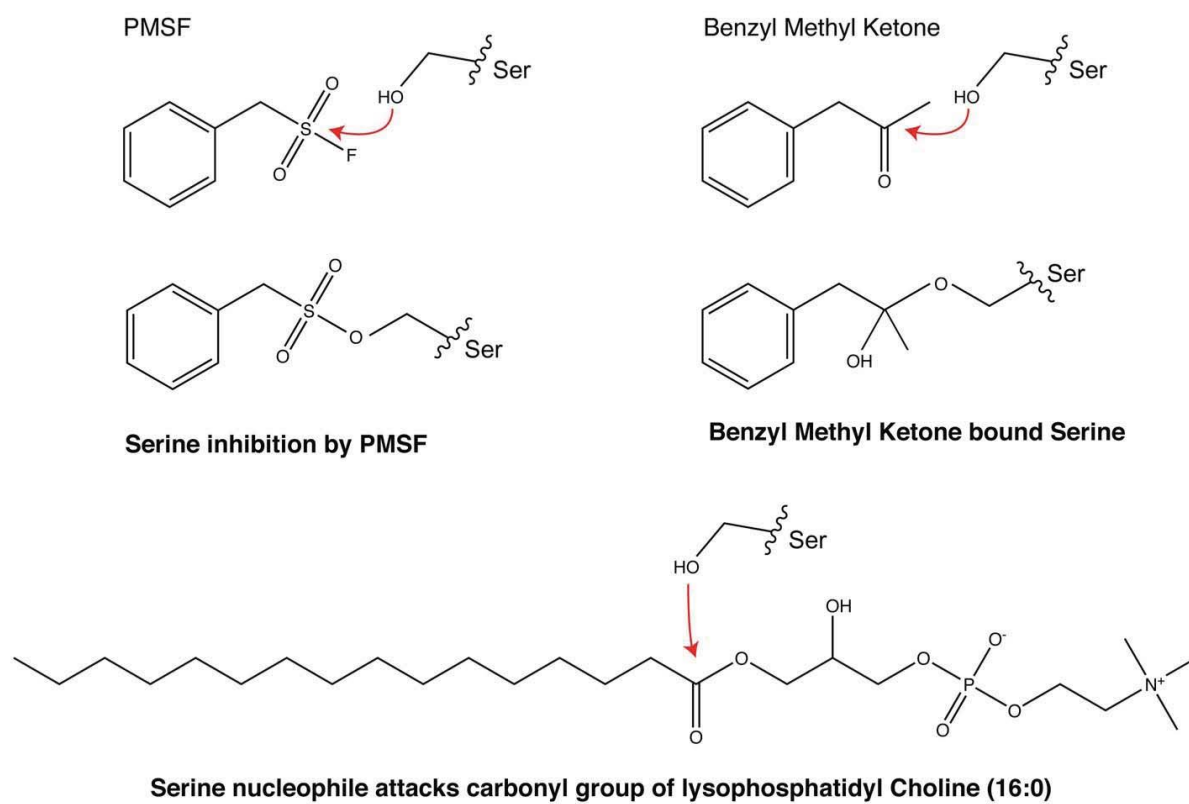

**Supplemental Figure S3.**

Nucleophilic serine attacks carbonyl group of the substrate. The serine becomes covalently attached to the substrate. For the comparison, similar process of serine protease inhibitor, PMSF is shown.
